# Supplementary material for: Childhood trauma, depression, resilience and suicide risk in individuals with inflammatory bowel disease
Source: PubMed Central journal article supplement — J Health Psychol. 2021 Mar 15;27(7):1626–34. doi: 10.1177/1359105321999085 (PMC9092906; doi:10.1177/1359105321999085), 2021-03-15
Supplement: sj-pdf-4-hpq-10.1177_1359105321999085.pdf [file sj-pdf-4-hpq-10.1177_1359105321999085.pdf]

Log Files/ Output

## Frequencies

|   |         | Which country do you currently live in (e.g., Canada, United States, Australia, etc.)? | Please indicate if you are: - Selected Choice | Please indicate your ethnicity - Selected Choice | What is the highest level of education you have attained? | Are you living with a partner or spouse? | What is your current employment status? |
|---|---------|----------------------------------------------------------------------------------------|-----------------------------------------------|--------------------------------------------------|-----------------------------------------------------------|------------------------------------------|-----------------------------------------|
| N | Valid   | 172                                                                                    | 172                                           | 172                                              | 172                                                       | 172                                      | 171                                     |
|   | Missing | 0                                                                                      | 0                                             | 0                                                | 0                                                         | 0                                        | 1                                       |

## Frequency Table

### Which country do you currently live in (e.g., Canada, United States, Australia, etc.)?

|       |                  | Frequency | Percent | Valid Percent | Cumulative Percent |
|-------|------------------|-----------|---------|---------------|--------------------|
| Valid | Australia        | 7         | 4.1     | 4.1           | 4.1                |
|       | Canada           | 61        | 35.5    | 35.5          | 39.5               |
|       | Ireland          | 8         | 4.7     | 4.7           | 44.2               |
|       | Latvia           | 1         | .6      | .6            | 44.8               |
|       | New Zealand      | 21        | 12.2    | 12.2          | 57.0               |
|       | Northern Ireland | 7         | 4.1     | 4.1           | 61.0               |
|       | Scotland         | 5         | 2.9     | 2.9           | 64.0               |
|       | United Kingdom   | 29        | 16.9    | 16.9          | 80.8               |
|       | United States    | 33        | 19.2    | 19.2          | 100.0              |
|       | Total            | 172       | 100.0   | 100.0         |                    |

### Please indicate if you are: - Selected Choice

|       |        | Frequency | Percent | Valid Percent | Cumulative Percent |
|-------|--------|-----------|---------|---------------|--------------------|
| Valid | Male   | 40        | 23.3    | 23.3          | 23.3               |
|       | Female | 132       | 76.7    | 76.7          | 100.0              |
|       | Total  | 172       | 100.0   | 100.0         |                    |

### Please indicate your ethnicity - Selected Choice

|       |                           | Frequency | Percent | Valid Percent | Cumulative Percent |
|-------|---------------------------|-----------|---------|---------------|--------------------|
| Valid | Caucasian/White           | 163       | 94.8    | 94.8          | 94.8               |
|       | Hispanic or Latino        | 1         | .6      | .6            | 95.3               |
|       | Aboriginal                | 1         | .6      | .6            | 95.9               |
|       | Asian                     | 3         | 1.7     | 1.7           | 97.7               |
|       | Black/African-Canadian    | 1         | .6      | .6            | 98.3               |
|       | Other, please specify ... | 3         | 1.7     | 1.7           | 100.0              |
|       | Total                     | 172       | 100.0   | 100.0         |                    |

### What is the highest level of education you have attained?

|       |                                                                        | Frequency | Percent | Valid Percent | Cumulative Percent |
|-------|------------------------------------------------------------------------|-----------|---------|---------------|--------------------|
| Valid | Less than high school                                                  | 4         | 2.3     | 2.3           | 2.3                |
|       | High school or GED                                                     | 34        | 19.8    | 19.8          | 22.1               |
|       | Some college/university                                                | 31        | 18.0    | 18.0          | 40.1               |
|       | Graduate from college/university                                       | 67        | 39.0    | 39.0          | 79.1               |
|       | Some graduate or professional school after college/university          | 8         | 4.7     | 4.7           | 83.7               |
|       | Graduate from graduate or professional school after college/university | 28        | 16.3    | 16.3          | 100.0              |
|       | Total                                                                  | 172       | 100.0   | 100.0         |                    |

### Are you living with a partner or spouse?

|       |       | Frequency | Percent | Valid Percent | Cumulative Percent |
|-------|-------|-----------|---------|---------------|--------------------|
| Valid | No    | 57        | 33.1    | 33.1          | 33.1               |
|       | Yes   | 115       | 66.9    | 66.9          | 100.0              |
|       | Total | 172       | 100.0   | 100.0         |                    |

### What is your current employment status?

|       |          | Frequency | Percent | Valid Percent | Cumulative Percent |
|-------|----------|-----------|---------|---------------|--------------------|
| Valid | Employed | 113       | 65.7    | 66.1          | 66.1               |

|         |            |     |       |       |       |
|---------|------------|-----|-------|-------|-------|
|         | Unemployed | 16  | 9.3   | 9.4   | 75.4  |
|         | Retired    | 10  | 5.8   | 5.8   | 81.3  |
|         | Disabled   | 16  | 9.3   | 9.4   | 90.6  |
|         | Student    | 16  | 9.3   | 9.4   | 100.0 |
|         | Total      | 171 | 99.4  | 100.0 |       |
| Missing | System     | 1   | .6    |       |       |
| Total   |            | 172 | 100.0 |       |       |

**Which diagnosis of Inflammatory Bowel Disease have you received?**

|       |                    | Frequency | Percent | Valid Percent | Cumulative Percent |
|-------|--------------------|-----------|---------|---------------|--------------------|
| Valid | Crohn's Disease    | 96        | 55.8    | 55.8          | 55.8               |
|       | Ulcerative Colitis | 59        | 34.3    | 34.3          | 90.1               |
|       | Both               | 17        | 9.9     | 9.9           | 100.0              |
|       | Total              | 172       | 100.0   | 100.0         |                    |

**Prior to the age of 17, did you experience a death of a very close friend or family member?**

|       |       | Frequency | Percent | Valid Percent | Cumulative Percent |
|-------|-------|-----------|---------|---------------|--------------------|
| Valid | No    | 71        | 41.3    | 41.3          | 41.3               |
|       | Yes   | 101       | 58.7    | 58.7          | 100.0              |
|       | Total | 172       | 100.0   | 100.0         |                    |

**Prior to the age of 17, was there a major upheaval between your parents (such as divorce, separation)?**

|       |       | Frequency | Percent | Valid Percent | Cumulative Percent |
|-------|-------|-----------|---------|---------------|--------------------|
| Valid | No    | 99        | 57.6    | 57.6          | 57.6               |
|       | Yes   | 73        | 42.4    | 42.4          | 100.0              |
|       | Total | 172       | 100.0   | 100.0         |                    |

**Prior to the age of 17, did you have a traumatic sexual experience (raped, molested, etc.)?**

|  |  | Frequency | Percent | Valid Percent | Cumulative Percent |
|--|--|-----------|---------|---------------|--------------------|
|--|--|-----------|---------|---------------|--------------------|

| Valid | No  | 129 | 75.0  | 75.0  | 75.0  |
|-------|-----|-----|-------|-------|-------|
|       | Yes | 43  | 25.0  | 25.0  | 100.0 |
| Total |     | 172 | 100.0 | 100.0 |       |

**Prior to the age of 17, were you the victim of violence (child abuse, mugged or assaulted -- other than sexual)?**

|       |     | Frequency | Percent | Valid Percent | Cumulative Percent |
|-------|-----|-----------|---------|---------------|--------------------|
| Valid | No  | 131       | 76.2    | 76.2          | 76.2               |
|       | Yes | 41        | 23.8    | 23.8          | 100.0              |
| Total |     | 172       | 100.0   | 100.0         |                    |

**Prior to the age of 17, were you extremely ill or injured?**

|         |        | Frequency | Percent | Valid Percent | Cumulative Percent |
|---------|--------|-----------|---------|---------------|--------------------|
| Valid   | No     | 119       | 69.2    | 69.6          | 69.6               |
|         | Yes    | 52        | 30.2    | 30.4          | 100.0              |
|         | Total  | 171       | 99.4    | 100.0         |                    |
| Missing | System | 1         | .6      |               |                    |
| Total   |        | 172       | 100.0   |               |                    |

**Prior to the age of 17, did you experience any other major upheaval that you think may have shaped your life or personality significantly?**

|       |     | Frequency | Percent | Valid Percent | Cumulative Percent |
|-------|-----|-----------|---------|---------------|--------------------|
| Valid | No  | 101       | 58.7    | 58.7          | 58.7               |
|       | Yes | 71        | 41.3    | 41.3          | 100.0              |
| Total |     | 172       | 100.0   | 100.0         |                    |

DESCRIPTIVES VARIABLES=Demo\_DOB\_2  
 /STATISTICS=MEAN STDDEV MIN MAX.

# Descriptives

## Descriptive Statistics

|                                       | N   | Minimum | Maximum | Mean      | Std. Deviation |
|---------------------------------------|-----|---------|---------|-----------|----------------|
| What is your date of birth?<br>- Year | 170 | 1940.00 | 2000.00 | 1978.4941 | 12.87732       |
| Valid N (listwise)                    | 170 |         |         |           |                |

ONEWAY SBQR\_HT BY Demo\_DOB\_2  
/MISSING ANALYSIS.

## Oneway

### ANOVA

SBQ-R Holden Total

|                | Sum of Squares | df  | Mean Square | F    | Sig. |
|----------------|----------------|-----|-------------|------|------|
| Between Groups | 513.199        | 50  | 10.264      | .864 | .717 |
| Within Groups  | 1414.454       | 119 | 11.886      |      |      |
| Total          | 1927.653       | 169 |             |      |      |

ONEWAY SBQR\_HT BY Demo\_Gender  
/MISSING ANALYSIS.

## Oneway

### ANOVA

SBQ-R Holden Total

|                | Sum of Squares | df  | Mean Square | F    | Sig. |
|----------------|----------------|-----|-------------|------|------|
| Between Groups | 6.427          | 1   | 6.427       | .545 | .461 |
| Within Groups  | 2004.892       | 170 | 11.793      |      |      |
| Total          | 2011.320       | 171 |             |      |      |

ONEWAY SBQR\_HT BY Demo\_IBD\_Type  
/MISSING ANALYSIS.

# Oneway

## ANOVA

SBQ-R Holden Total

|                | Sum of Squares | df  | Mean Square | F    | Sig. |
|----------------|----------------|-----|-------------|------|------|
| Between Groups | 10.733         | 2   | 5.367       | .453 | .636 |
| Within Groups  | 2000.586       | 169 | 11.838      |      |      |
| Total          | 2011.320       | 171 |             |      |      |

ONEWAY SBQR\_HT BY Demo\_Country2  
/MISSING ANALYSIS.

# Oneway

## ANOVA

SBQ-R Holden Total

|                | Sum of Squares | df  | Mean Square | F     | Sig. |
|----------------|----------------|-----|-------------|-------|------|
| Between Groups | 136.968        | 8   | 17.121      | 1.489 | .165 |
| Within Groups  | 1874.352       | 163 | 11.499      |       |      |
| Total          | 2011.320       | 171 |             |       |      |

\* Encoding: UTF-8.

/\* PROCESS version 3.5 \*/.

/\* Written by Andrew F. Hayes \*/.

/\* www.afhayes.com \*/.

/\* www.processmacro.org \*/.

/\* Copyright 2017-2020 by Andrew F. Hayes \*/.

/\* Documented in <http://www.guilford.com/p/hayes3> \*/.

/\* PROCESS workshop schedule at <http://www.processmacro.org/workshops.html> \*/.

/\* THIS SOFTWARE IS PROVIDED "AS IS", WITHOUT WARRANTY OF ANY KIND \*/.

/\* EXPRESS OR IMPLIED, INCLUDING BUT NOT LIMITED TO THE WARRANTIES OF \*/.

/\* MERCHANTABILITY, FITNESS FOR A PARTICULAR PURPOSE AND NONINFRINGEMENT \*/.

/\* IN NO EVENT SHALL THE COPYRIGHT HOLDERS BE LIABLE FOR ANY CLAIM, \*/.

/\* DAMAGES OR OTHER LIABILITY, WHETHER IN AN ACTION OF CONTRACT, TORT \*/.

/\* OR OTHERWISE, ARISING FROM, OUT OF OR IN CONNECTION WITH THE \*/.

```
/* SOFTWARE OR THE USE OR OTHER DEALINGS IN THE SOFTWARE */.  
/* USE OF THIS SOFTWARE IMPLIES AGREEMENT WITH THESE TERMS */.
```

```
set printback=off.
```

## Matrix

Run MATRIX procedure:

```
***** PROCESS Procedure for SPSS Version 3.5  
*****
```

Written by Andrew F. Hayes, Ph.D. [www.afhayes.com](http://www.afhayes.com)  
Documentation available in Hayes (2018). [www.guilford.com/p/hayes3](http://www.guilford.com/p/hayes3)

```
*****  
*****
```

```
Model : 7  
Y : SBQR_HT  
X : CTES_T  
M : PHQ9_HT  
W : BRS_HT
```

```
Sample  
Size: 172
```

```
*****  
*****
```

```
OUTCOME VARIABLE:  
PHQ9_HT
```

### Model Summary

|  | R     | R-sq  | MSE     | F       | df1    | df2      | p     |
|--|-------|-------|---------|---------|--------|----------|-------|
|  | .5714 | .3264 | 28.9163 | 27.1405 | 3.0000 | 168.0000 | .0000 |

### Model

|          | coeff   | se     | t       | p     | LLCI    | ULCI  |
|----------|---------|--------|---------|-------|---------|-------|
| constant | 19.7023 | 2.7915 | 7.0581  | .0000 | 14.1915 |       |
| 25.2132  |         |        |         |       |         |       |
| CTES_T   | .2330   | .2118  | 1.1001  | .2728 | -.1851  | .6511 |
| BRS_HT   | -3.7735 | .9148  | -4.1250 | .0001 | -5.5795 |       |
| -1.9676  |         |        |         |       |         |       |
| Int_1    | -.0191  | .0749  | -.2553  | .7988 | -.1669  | .1287 |

Product terms key:

Int\_1 : CTES\_T x BRS\_HT

Test(s) of highest order unconditional interaction(s):

|     | R2-chng | F     | df1    | df2      | p     |
|-----|---------|-------|--------|----------|-------|
| X*W | .0003   | .0652 | 1.0000 | 168.0000 | .7988 |

\*\*\*\*\*  
\*\*\*\*\*

OUTCOME VARIABLE:

SBQR\_HT

Model Summary

|  | R     | R-sq  | MSE    | F       | df1    | df2      | p     |
|--|-------|-------|--------|---------|--------|----------|-------|
|  | .5700 | .3250 | 8.0339 | 40.6767 | 2.0000 | 169.0000 | .0000 |

Model

|          | coeff  | se    | t      | p     | LLCI   | ULCI  |
|----------|--------|-------|--------|-------|--------|-------|
| constant | 2.9603 | .4627 | 6.3974 | .0000 | 2.0468 |       |
| CTES_T   | .0975  | .0303 | 3.2153 | .0016 | .0377  | .1574 |
| PHQ9_HT  | .2461  | .0351 | 7.0089 | .0000 | .1768  | .3155 |

\*\*\*\*\* DIRECT AND INDIRECT EFFECTS OF X ON Y \*\*\*\*\*

Direct effect of X on Y

| Effect | se    | t      | p     | LLCI  | ULCI  |
|--------|-------|--------|-------|-------|-------|
| .0975  | .0303 | 3.2153 | .0016 | .0377 | .1574 |

Conditional indirect effects of X on Y:

INDIRECT EFFECT:

CTES\_T -> PHQ9\_HT -> SBQR\_HT

| BRS_HT | Effect | BootSE | BootLLCI | BootULCI |
|--------|--------|--------|----------|----------|
| 2.1262 | .0473  | .0201  | .0087    | .0882    |
| 2.9283 | .0436  | .0143  | .0153    | .0721    |
| 3.7304 | .0398  | .0203  | -.0011   | .0794    |

Index of moderated mediation:

|        | Index  | BootSE | BootLLCI | BootULCI |
|--------|--------|--------|----------|----------|
| BRS_HT | -.0047 | .0178  | -.0418   | .0294    |

---

\*\*\*\*\* ANALYSIS NOTES AND ERRORS



\*\*\*\*\*

Level of confidence for all confidence intervals in output:  
95.0000

Number of bootstrap samples for percentile bootstrap confidence intervals:  
10000

W values in conditional tables are the mean and +/- SD from the mean.

----- END MATRIX -----

\* Encoding: UTF-8.

/\* PROCESS version 3.5 \*/.  
/\* Written by Andrew F. Hayes \*/.  
/\* www.afhayes.com \*/.  
/\* www.processmacro.org \*/.  
/\* Copyright 2017-2020 by Andrew F. Hayes \*/.  
/\* Documented in <http://www.guilford.com/p/hayes3> \*/.  
/\* PROCESS workshop schedule at <http://www.processmacro.org/workshops.html> \*/.  
\*/.

/\* THIS SOFTWARE IS PROVIDED "AS IS", WITHOUT WARRANTY OF ANY KIND \*/.  
/\* EXPRESS OR IMPLIED, INCLUDING BUT NOT LIMITED TO THE WARRANTIES OF \*/.  
/\* MERCHANTABILITY, FITNESS FOR A PARTICULAR PURPOSE AND NONINFRINGEMENT \*/.  
/\* IN NO EVENT SHALL THE COPYRIGHT HOLDERS BE LIABLE FOR ANY CLAIM, \*/.  
/\* DAMAGES OR OTHER LIABILITY, WHETHER IN AN ACTION OF CONTRACT, TORT \*/.  
/\* OR OTHERWISE, ARISING FROM, OUT OF OR IN CONNECTION WITH THE \*/.  
/\* SOFTWARE OR THE USE OR OTHER DEALINGS IN THE SOFTWARE \*/.  
/\* USE OF THIS SOFTWARE IMPLIES AGREEMENT WITH THESE TERMS \*/.

set printback=off.

## Matrix

Run MATRIX procedure:

\*\*\*\*\* PROCESS Procedure for SPSS Version 3.5  
\*\*\*\*\*

Written by Andrew F. Hayes, Ph.D.

[www.afhayes.com](http://www.afhayes.com)

\*\*\*\*\*  
\*\*\*\*\*

Model : 14  
 Y : SBQR\_HT  
 X : CTES\_T  
 M : PHQ9\_HT  
 W : BRS\_HT

Sample  
 Size: 172

\*\*\*\*\*  
\*\*\*\*\*

OUTCOME VARIABLE:  
 PHQ9\_HT

Model Summary

|  | R     | R-sq  | MSE     | F       | df1    | df2      | p     |
|--|-------|-------|---------|---------|--------|----------|-------|
|  | .3110 | .0967 | 38.3210 | 18.2091 | 1.0000 | 170.0000 | .0000 |

Model

|          | coeff  | se    | t      | p     | LLCI   | ULCI   |
|----------|--------|-------|--------|-------|--------|--------|
| constant | 7.6999 | .8201 | 9.3887 | .0000 | 6.0809 | 9.3188 |
| CTES_T   | .2687  | .0630 | 4.2672 | .0000 | .1444  | .3930  |

\*\*\*\*\*  
\*\*\*\*\*

OUTCOME VARIABLE:  
 SBQR\_HT

Model Summary

|  | R     | R-sq  | MSE    | F       | df1    | df2      | p     |
|--|-------|-------|--------|---------|--------|----------|-------|
|  | .5741 | .3296 | 8.0744 | 20.5250 | 4.0000 | 167.0000 | .0000 |

Model

|          | coeff  | se     | t      | p     | LLCI    | ULCI   |
|----------|--------|--------|--------|-------|---------|--------|
| constant | 4.5744 | 1.8074 | 2.5309 | .0123 | 1.0060  | 8.1427 |
| CTES_T   | .0959  | .0305  | 3.1482 | .0019 | .0357   | .1560  |
| PHQ9_HT  | .1878  | .1243  | 1.5116 | .1325 | -.0575  | .4332  |
| BRS_HT   | -.4649 | .5351  | -.8688 | .3862 | -1.5212 | .5915  |

Int\_1 .0135 .0426 .3170 .7517 -.0707 .0977

Product terms key:

Int\_1 : PHQ9\_HT x BRS\_HT

Test(s) of highest order unconditional interaction(s):

|     | R2-chng | F     | df1    | df2      | p     |
|-----|---------|-------|--------|----------|-------|
| M*W | .0004   | .1005 | 1.0000 | 167.0000 | .7517 |

\*\*\*\*\* DIRECT AND INDIRECT EFFECTS OF X ON Y \*\*\*\*\*

Direct effect of X on Y

| Effect | se    | t      | p     | LLCI  | ULCI  |
|--------|-------|--------|-------|-------|-------|
| .0959  | .0305 | 3.1482 | .0019 | .0357 | .1560 |

Conditional indirect effects of X on Y:

INDIRECT EFFECT:

CTES\_T -> PHQ9\_HT -> SBQR\_HT

| BRS_HT | Effect | BootSE | BootLLCI | BootULCI |
|--------|--------|--------|----------|----------|
| 2.1262 | .0582  | .0199  | .0223    | .0998    |
| 2.9283 | .0611  | .0175  | .0282    | .0975    |
| 3.7304 | .0640  | .0197  | .0268    | .1050    |

Index of moderated mediation:

|        | Index | BootSE | BootLLCI | BootULCI |
|--------|-------|--------|----------|----------|
| BRS_HT | .0036 | .0115  | -.0194   | .0267    |

---

\*\*\*\*\* ANALYSIS NOTES AND ERRORS \*\*\*\*\*

Level of confidence for all confidence intervals in output:  
95.0000

Number of bootstrap samples for percentile bootstrap confidence intervals:  
10000

W values in conditional tables are the mean and +/- SD from the mean.

----- END MATRIX -----

\* Encoding: UTF-8.

```
/* PROCESS version 3.5 */.
/* Written by Andrew F. Hayes */.
/* www.afhayes.com */.
/* www.processmacro.org */.
/* Copyright 2017-2020 by Andrew F. Hayes */.
/* Documented in http://www.guilford.com/p/hayes3 */.
/* PROCESS workshop schedule at http://www.processmacro.org/workshops.html
*/.
```

```
/* THIS SOFTWARE IS PROVIDED "AS IS", WITHOUT WARRANTY OF ANY KIND */.
/* EXPRESS OR IMPLIED, INCLUDING BUT NOT LIMITED TO THE WARRANTIES OF */.
/* MERCHANTABILITY, FITNESS FOR A PARTICULAR PURPOSE AND NONINFRINGEMENT */.
/* IN NO EVENT SHALL THE COPYRIGHT HOLDERS BE LIABLE FOR ANY CLAIM, */.
/* DAMAGES OR OTHER LIABILITY, WHETHER IN AN ACTION OF CONTRACT, TORT */.
/* OR OTHERWISE, ARISING FROM, OUT OF OR IN CONNECTION WITH THE */.
/* SOFTWARE OR THE USE OR OTHER DEALINGS IN THE SOFTWARE */.
/* USE OF THIS SOFTWARE IMPLIES AGREEMENT WITH THESE TERMS */.
```

```
set printback=off.
```

## Matrix

```
Run MATRIX procedure:
```

```
***** PROCESS Procedure for SPSS Version 3.5
*****
```

```
Written by Andrew F. Hayes, Ph.D. www.afhayes.com
Documentation available in Hayes (2018). www.guilford.com/p/hayes3
```

```
*****
*****
```

```
Model : 58
Y : SBQR_HT
X : CTES_T
M : PHQ9_HT
W : BRS_HT
```

```
Sample
Size: 172
```

```
*****
*****
```

OUTCOME VARIABLE:

PHQ9\_HT

Model Summary

|  | R    | R-sq | MSE    | F      | df1   | df2     | p    |
|--|------|------|--------|--------|-------|---------|------|
|  | .571 | .326 | 28.916 | 27.141 | 3.000 | 168.000 | .000 |

Model

|          | coeff  | se    | t      | p    | LLCI   | ULCI   |
|----------|--------|-------|--------|------|--------|--------|
| constant | 19.702 | 2.791 | 7.058  | .000 | 14.191 | 25.213 |
| CTES_T   | .233   | .212  | 1.100  | .273 | -.185  | .651   |
| BRS_HT   | -3.774 | .915  | -4.125 | .000 | -5.579 | -1.968 |
| Int_1    | -.019  | .075  | -.255  | .799 | -.167  | .129   |

Product terms key:

Int\_1 : CTES\_T x BRS\_HT

Test(s) of highest order unconditional interaction(s):

|     | R2-chng | F    | df1   | df2     | p    |
|-----|---------|------|-------|---------|------|
| X*W | .000    | .065 | 1.000 | 168.000 | .799 |

\*\*\*\*\*  
\*\*\*\*\*

OUTCOME VARIABLE:

SBQR\_HT

Model Summary

|  | R    | R-sq | MSE   | F      | df1   | df2     | p    |
|--|------|------|-------|--------|-------|---------|------|
|  | .574 | .330 | 8.074 | 20.525 | 4.000 | 167.000 | .000 |

Model

|          | coeff | se    | t     | p    | LLCI   | ULCI  |
|----------|-------|-------|-------|------|--------|-------|
| constant | 4.574 | 1.807 | 2.531 | .012 | 1.006  | 8.143 |
| CTES_T   | .096  | .030  | 3.148 | .002 | .036   | .156  |
| PHQ9_HT  | .188  | .124  | 1.512 | .133 | -.057  | .433  |
| BRS_HT   | -.465 | .535  | -.869 | .386 | -1.521 | .591  |
| Int_1    | .014  | .043  | .317  | .752 | -.071  | .098  |

Product terms key:

Int\_1 : PHQ9\_HT x BRS\_HT

Test(s) of highest order unconditional interaction(s):

|     | R2-chng | F    | df1   | df2     | p    |
|-----|---------|------|-------|---------|------|
| M*W | .000    | .100 | 1.000 | 167.000 | .752 |

\*\*\*\*\* DIRECT AND INDIRECT EFFECTS OF X ON Y \*\*\*\*\*

Direct effect of X on Y

| Effect | se   | t     | p    | LLCI | ULCI |
|--------|------|-------|------|------|------|
| .096   | .030 | 3.148 | .002 | .036 | .156 |

Conditional indirect effects of X on Y:

INDIRECT EFFECT:

CTES\_T -> PHQ9\_HT -> SBQR\_HT

| BRS_HT | Effect | BootSE | BootLLCI | BootULCI |
|--------|--------|--------|----------|----------|
| 2.126  | .042   | .020   | .006     | .085     |
| 2.928  | .040   | .014   | .014     | .068     |
| 3.730  | .039   | .020   | -.002    | .079     |

---

\*\*\*\*\* ANALYSIS NOTES AND ERRORS \*\*\*\*\*

Level of confidence for all confidence intervals in output:  
95.0000

Number of bootstrap samples for percentile bootstrap confidence intervals:  
10000

W values in conditional tables are the mean and +/- SD from the mean.

----- END MATRIX -----

Run MATRIX procedure:

\*\*\*\*\* PROCESS Procedure for SPSS Version 3.5 \*\*\*\*\*

Written by Andrew F. Hayes, Ph.D. [www.afhayes.com](http://www.afhayes.com)  
Documentation available in Hayes (2018). [www.guilford.com/p/hayes3](http://www.guilford.com/p/hayes3)

\*\*\*\*\*

Model : 6  
Y : SBQR\_HT  
X : CTES\_T

M1 : BRS\_HT  
M2 : PHQ9\_HT

Sample  
Size: 172

\*\*\*\*\*  
\*\*\*\*\*

OUTCOME VARIABLE:  
BRS\_HT

Model Summary

|  | R     | R-sq  | MSE   | F      | df1    | df2      | p     |
|--|-------|-------|-------|--------|--------|----------|-------|
|  | .2077 | .0431 | .6192 | 7.6623 | 1.0000 | 170.0000 | .0063 |

Model

|          | coeff  | se    | t       | p     | LLCI   | ULCI   |
|----------|--------|-------|---------|-------|--------|--------|
| constant | 3.1643 | .1042 | 30.3533 | .0000 | 2.9585 |        |
| CTES_T   | -.0222 | .0080 | -2.7681 | .0063 | -.0380 | -.0064 |

\*\*\*\*\*  
\*\*\*\*\*

OUTCOME VARIABLE:  
PHQ9\_HT

Model Summary

|  | R     | R-sq  | MSE     | F       | df1    | df2      | p     |
|--|-------|-------|---------|---------|--------|----------|-------|
|  | .5711 | .3262 | 28.7564 | 40.9045 | 2.0000 | 169.0000 | .0000 |

Model

|          | coeff   | se     | t       | p     | LLCI    | ULCI  |
|----------|---------|--------|---------|-------|---------|-------|
| constant | 20.2459 | 1.8000 | 11.2475 | .0000 | 16.6925 |       |
| CTES_T   | .1809   | .0558  | 3.2433  | .0014 | .0708   | .2909 |
| BRS_HT   | -3.9649 | .5227  | -7.5857 | .0000 | -4.9967 |       |
|          | -2.9331 |        |         |       |         |       |

\*\*\*\*\*  
\*\*\*\*\*

OUTCOME VARIABLE:  
SBQR\_HT

Model Summary

|  | R     | R-sq  | MSE    | F       | df1    | df2      | p |
|--|-------|-------|--------|---------|--------|----------|---|
|  | .5737 | .3292 | 8.0311 | 27.4803 | 3.0000 | 168.0000 |   |
|  | .0000 |       |        |         |        |          |   |

Model

|          | coeff  | se     | t       | p     | LLCI   | ULCI  |
|----------|--------|--------|---------|-------|--------|-------|
| constant | 4.1640 | 1.2579 | 3.3103  | .0011 | 1.6807 |       |
|          | 6.6473 |        |         |       |        |       |
| CTES_T   | .0959  | .0304  | 3.1580  | .0019 | .0360  | .1559 |
| BRS_HT   | -.3291 | .3198  | -1.0291 | .3049 | -.9605 | .3023 |
| PHQ9_HT  | .2251  | .0407  | 5.5361  | .0000 | .1448  | .3053 |

\*\*\*\*\* TOTAL EFFECT MODEL

\*\*\*\*\*

OUTCOME VARIABLE:

SBQR\_HT

Model Summary

|  | R     | R-sq  | MSE     | F       | df1    | df2      | p |
|--|-------|-------|---------|---------|--------|----------|---|
|  | .3588 | .1287 | 10.3082 | 25.1181 | 1.0000 | 170.0000 |   |
|  | .0000 |       |         |         |        |          |   |

Model

|          | coeff  | se    | t       | p     | LLCI   | ULCI  |
|----------|--------|-------|---------|-------|--------|-------|
| constant | 4.8555 | .4254 | 11.4152 | .0000 | 4.0158 |       |
|          | 5.6952 |       |         |       |        |       |
| CTES_T   | .1637  | .0327 | 5.0118  | .0000 | .0992  | .2281 |

\*\*\*\*\* TOTAL, DIRECT, AND INDIRECT EFFECTS OF X ON Y \*\*\*\*\*

Total effect of X on Y

|      | Effect | se    | t      | p     | LLCI  | ULCI  | c_ps |
|------|--------|-------|--------|-------|-------|-------|------|
| c_cs | .1637  | .0327 | 5.0118 | .0000 | .0992 | .2281 |      |
|      | .0477  | .3588 |        |       |       |       |      |

Direct effect of X on Y

|       | Effect | se    | t      | p     | LLCI  | ULCI  | c'_ps |
|-------|--------|-------|--------|-------|-------|-------|-------|
| c'_cs | .0959  | .0304 | 3.1580 | .0019 | .0360 | .1559 |       |
|       | .0280  | .2103 |        |       |       |       |       |

Indirect effect(s) of X on Y:

|       | Effect | BootSE | BootLLCI | BootULCI |
|-------|--------|--------|----------|----------|
| TOTAL | .0678  | .0171  | .0355    | .1033    |
| Ind1  | .0073  | .0080  | -.0065   | .0253    |



|      |       |       |       |       |
|------|-------|-------|-------|-------|
| Ind2 | .0407 | .0143 | .0139 | .0702 |
| Ind3 | .0198 | .0078 | .0063 | .0369 |

Partially standardized indirect effect(s) of X on Y:

|       | Effect | BootSE | BootLLCI | BootULCI |
|-------|--------|--------|----------|----------|
| TOTAL | .0198  | .0046  | .0110    | .0292    |
| Ind1  | .0021  | .0023  | -.0019   | .0074    |
| Ind2  | .0119  | .0040  | .0043    | .0199    |
| Ind3  | .0058  | .0022  | .0019    | .0106    |

Completely standardized indirect effect(s) of X on Y:

|       | Effect | BootSE | BootLLCI | BootULCI |
|-------|--------|--------|----------|----------|
| TOTAL | .1485  | .0359  | .0783    | .2198    |
| Ind1  | .0160  | .0173  | -.0145   | .0549    |
| Ind2  | .0892  | .0310  | .0303    | .1519    |
| Ind3  | .0433  | .0164  | .0142    | .0781    |

Indirect effect key:

|      |        |    |         |    |         |            |
|------|--------|----|---------|----|---------|------------|
| Ind1 | CTES_T | -> | BRS_HT  | -> | SBQR_HT |            |
| Ind2 | CTES_T | -> | PHQ9_HT | -> | SBQR_HT |            |
| Ind3 | CTES_T | -> | BRS_HT  | -> | PHQ9_HT | -> SBQR_HT |

\*\*\*\*\* ANALYSIS NOTES AND ERRORS \*\*\*\*\*

Level of confidence for all confidence intervals in output:  
95.0000

Number of bootstrap samples for percentile bootstrap confidence intervals:  
10000

----- END MATRIX -----
